# Supplementary material for: Advance Care Planning Claims and Health Care Utilization Among Seriously Ill Patients Near the End of Life
Source: PubMed Central journal article supplement (PMC6827391; doi:10.1001/jamanetworkopen.2019.14471), 2019-11-01
Supplement: jamanetwopen-2-e1914471-s001.pdf [file jamanetwopen-2-e1914471-s001.pdf]

## Supplementary Online Content

Ashana DC, Chen X, Agiro A, et al. Advance care planning claims and health care utilization among seriously ill patients near the end of life. *JAMA Netw Open*. 2019;2(11):e1914471. doi:10.1001/jamanetworkopen.2019.14471

**eFigure.** Overlap in Propensity Score Between Patients With and Without Billed Advance Care Planning Encounters

**eTable 1.** Characteristics of Seriously Ill Patients With and Without Billed Advance Care Planning Encounters After 1:3 Propensity Score Matching

**eTable 2.** Propensity Score Matched Analysis of Outcomes of Seriously Ill Patients With a Billed Advance Care Planning Encounter Compared With Patients Without a Billed Advance Care Planning Encounter

**eTable 3.** Medical and Pharmacy Costs for Seriously Ill Patients With and Without Billed Advance Care Planning Encounters in 1:3 Propensity Score Matched Analyses

This supplementary material has been provided by the authors to give readers additional information about their work.

**eFigure.** Overlap in propensity score between patients with and without billed advance care planning encounters.

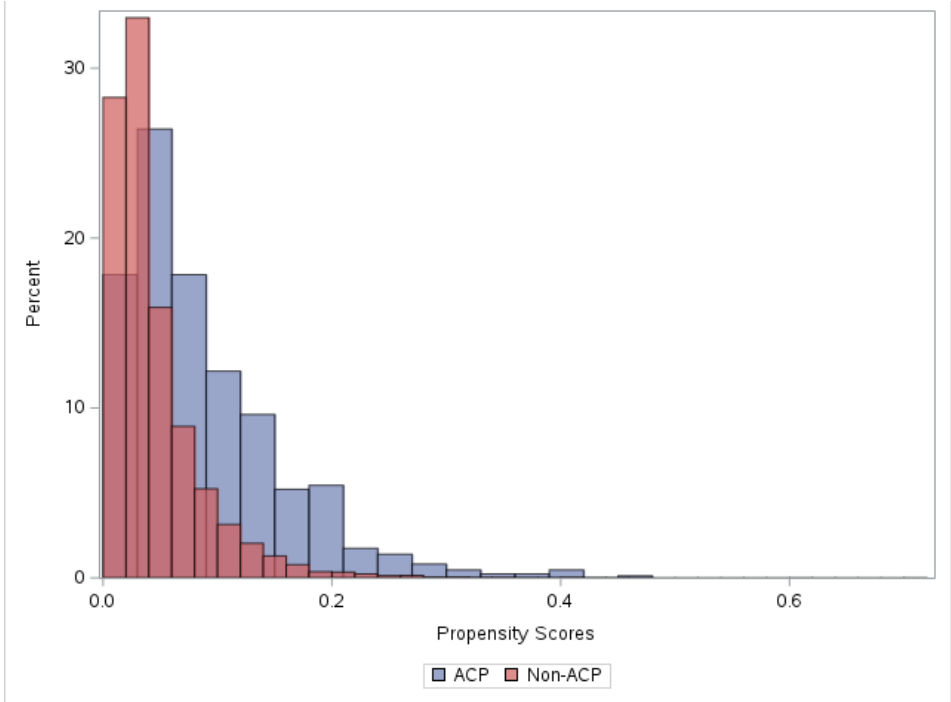

*Definition of abbreviations:* ACP = advance care planning. The likelihood of having a billed ACP encounter was modeled as a logistic regression adjusting for demographic variables (age, female gender and census region), Deyo-Charlson Comorbidity Index, behavioral health conditions (depression, anxiety, adjustment disorder), and baseline all-cause medical and hospitalization costs. The propensity scores indicate the probability of having a billed ACP encounter and range from 0 to 1.

**eTable 1.** Characteristics of seriously ill patients with and without billed advance care planning encounters after 1:3 propensity score matching

| Patient characteristics                        | All patients with serious illness   |                            |                                      |
|------------------------------------------------|-------------------------------------|----------------------------|--------------------------------------|
|                                                | Patients receiving ACP <sup>a</sup> | Patients without ACP claim | Standardized difference <sup>b</sup> |
| Patients, No.                                  | 855                                 | 2,565                      |                                      |
| Age, mean (SD)                                 | 81.4 (8.2)                          | 81.5 (7.9)                 | -0.02                                |
| Gender, %                                      |                                     |                            | 0.03                                 |
| Male                                           | 45.7                                | 46.0                       | -0.01                                |
| Female                                         | 54.3                                | 54.0                       | 0.01                                 |
| Region, %                                      |                                     |                            | 0.02                                 |
| Northeast                                      | 27.0                                | 26.2                       | 0.02                                 |
| Midwest                                        | 51.1                                | 51.6                       | -0.01                                |
| South                                          | 19.1                                | 19.2                       | -0.01                                |
| West                                           | 2.8                                 | 3.1                        | -0.02                                |
| Dey-Charlson Comorbidity Index, mean (SD)      | 6.0 (3.1)                           | 5.9 (3.2)                  | 0.02                                 |
| Number of Deyo-Charlson Comorbidities, %       |                                     |                            | 0.00                                 |
| 0                                              | 0.7                                 | 1.3                        | -0.06                                |
| 1-2                                            | 3.5                                 | 3.9                        | -0.02                                |
| ≥3                                             | 95.8                                | 94.9                       | 0.04                                 |
| Number of serious illness diagnoses, mean (SD) | 1.4 (0.8)                           | 1.4 (0.8)                  | -0.01                                |
| Serious illness diagnosis, %                   |                                     |                            |                                      |
| COPD                                           | 22.9                                | 21.1                       | 0.05                                 |
| ADRD                                           | 14.7                                | 13.7                       | 0.03                                 |
| Fibrotic lung disease                          | 8.8                                 | 8.9                        | -0.01                                |
| Advanced solid malignancy                      | 12.4                                | 16.0                       | -0.10                                |
| Neurodegenerative disease                      | 0.1                                 | 0.5                        | -0.07                                |
| ESRD                                           | 2.3                                 | 2.4                        | -0.01                                |
| Heart failure                                  | 80.4                                | 80.2                       | 0.01                                 |
| Number of hospital admissions, mean (SD)       | 2.0 (2.0)                           | 1.9 (2.2)                  | 0.01                                 |
| Number of ER visits, mean (SD)                 | 1.0 (1.5)                           | 1.1 (2.2)                  | -0.06                                |
| Total medical costs, mean \$ (SD) <sup>c</sup> | 45,691 (46,512)                     | 43,584 (49,659)            | 0.04                                 |
| Hospitalization                                | 29,841 (37,832)                     | 26,329 (39,716)            | 0.09                                 |
| Outpatient services                            | 12,401 (16,225)                     | 14,012 (19,570)            | -0.09                                |
| ER                                             | 1,227 (2,075)                       | 1,292 (2,494)              | -0.03                                |
| Total pharmacy costs, mean \$ (SD)             | 5,998 (12,440)                      | 5,851 (12,518)             | 0.01                                 |

*Definition of abbreviations:* ACP = advance care planning; ADRD = Alzheimer's disease and related dementias; COPD = chronic obstructive pulmonary disease; ER = emergency room; ESRD = end-stage renal disease; SD = standard deviation.

<sup>a</sup> We retained 855 of 864 total patients (99.0%) in the ACP group after matching.

<sup>b</sup> Comparing all patients receiving ACP and all patients without an ACP claim.

<sup>c</sup> Includes costs paid by the health plan and the patient.

**eTable 2.** Propensity score matched analysis of outcomes of seriously ill patients with a billed advance care planning encounter compared to patients without a billed advance care planning encounter

| Outcomes                              | IRR  | 95% CI      | P value |
|---------------------------------------|------|-------------|---------|
| Hospice use                           | 2.38 | 2.06-2.76   | <0.001  |
| Death                                 | 2.03 | 1.55-2.65   | <0.001  |
| Hospitalization                       | 1.27 | 1.16 - 1.39 | <0.001  |
| With ICU admission                    | 1.16 | 0.98 - 1.36 | 0.08    |
| Without ICU admission                 | 1.33 | 1.19 - 1.49 | <0.001  |
| Emergency room visit                  | 1.07 | 0.95 - 1.20 | 0.29    |
| Intensive therapy use                 | 0.74 | 0.68 - 0.81 | <0.001  |
| Intubation and mechanical ventilation | 1.26 | 0.82 - 1.93 | 0.29    |
| Gastrostomy tube insertion            | 1.28 | 0.54 - 3.05 | 0.58    |
| Dialysis                              | 0.74 | 0.66 - 0.82 | <0.001  |
| Enteral or parenteral nutrition       | 1.06 | 0.77 - 1.47 | 0.71    |
| Chemotherapy                          | 0.62 | 0.51 - 0.74 | <0.001  |

Definition of abbreviations: CI = confidence interval; IRR = incidence rate ratio.

**eTable 3.** Medical and pharmacy costs for seriously ill patients with and without billed advance care planning encounters in 1:3 propensity score matched analyses

| <b>Costs</b>                           | <b>Patients receiving ACP <sup>a</sup></b> | <b>Patients without ACP claim</b> | <b>Cost difference</b> | <b>P value</b> |
|----------------------------------------|--------------------------------------------|-----------------------------------|------------------------|----------------|
| Total PMPM medical costs, mean \$ (SD) | 10,094 (132,603)                           | 3,586 (13,974)                    | 6,508                  | <0.001         |
| Hospitalization                        | 8,564 (132,631)                            | 2,326 (13,696)                    | 6,238                  | 0.83           |
| ER                                     | 117 (394)                                  | 128 (655)                         | -10                    | 0.92           |
| Pharmacy PMPM costs, mean \$ (SD)      | 423 (1,117)                                | 491 (1,207)                       | -68                    | 0.02           |

*Definition of abbreviations:* ER = emergency room; PMPM = per member per month; SD = standard deviation. All US dollar amounts were adjusted to 2017 values using the consumer price index.

<sup>a</sup>We retained 855 of 864 total patients (99.0%) in the ACP group after matching.
